# Supplementary material for: Simultaneous detection of endocrine disrupting chemicals including conjugates in municipal wastewater and sludge with enhanced sample pretreatment and UPLC-MS/MS
Source: Royal Society of Chemistry journal article supplement (doi:10.1039/c5em00139k), 2015-01-01
Supplement: c5em00139k1.pdf [file c5em00139k1.pdf]

## Supplementary data

### Manuscript title:

Simultaneous detection of endocrine disrupting chemicals including conjugates in municipal wastewater and sludge with enhanced sample pretreatment and UPLC-MS/MS

### Authors:

Bing Zhu, Xiangjuan Yuan, Weiwei Ben, Yu Zhang, Min Yang, Zhimin Qiang\*

### List of supplementary material:

| Material | Title                                                                                                                                                                          | Page |
|----------|--------------------------------------------------------------------------------------------------------------------------------------------------------------------------------|------|
| Table S1 | Optional parameters of tandem MS and calibration curves of target EDCs.                                                                                                        | S2   |
| Table S2 | Intra- and inter-day precisions evaluated at three concentration levels of target EDCs.                                                                                        | S3   |
| Table S3 | Major characteristics of the influent and effluent of a local WWTP.                                                                                                            | S4   |
| Fig. S1  | Sampling points along the A/A/O treatment process in a local WWTP.                                                                                                             | S5   |
| Fig. S2  | (a) Illustration of E2 fragmentation to produce the 145.18 m/z ion; and (b) mass chromatograms of the product ions of E2 in the MS2 scan mode.                                 | S6   |
| Fig. S3  | Total-ion MRM chromatograms of 12 target EDCs (100 µg L <sup>-1</sup> each) in standard solution (prepared in MQ water), unpurified sludge sample, and purified sludge sample. | S7   |

**Table S1**

Operational parameters of tandem MS and calibration curves of target EDCs.

| Analyte | Formula                                            | Mother ion | Fragmentor<br>(V) | Quantifier<br>(cone energy/eV) | Qualifier<br>(cone energy/eV) | Linear slope <sup>a</sup> | R <sup>2</sup> | LOD <sup>b</sup><br>(pg) |
|---------|----------------------------------------------------|------------|-------------------|--------------------------------|-------------------------------|---------------------------|----------------|--------------------------|
| E1      | C <sub>18</sub> H <sub>22</sub> O <sub>2</sub>     | 269.2      | 160               | 145.2 (35)                     | 183.2 (45)                    | 478.9                     | 0.9991         | 2.1                      |
| E2      | C <sub>18</sub> H <sub>24</sub> O <sub>2</sub>     | 271.3      | 170               | 145.2 (40)                     | 183.2 (40)                    | 514.3                     | 0.9990         | 8.4                      |
| E3      | C <sub>18</sub> H <sub>24</sub> O <sub>3</sub>     | 287.2      | 170               | 145.2 (50)                     | 170.9 (34)                    | 466.9                     | 0.9987         | 9.1                      |
| EE2     | C <sub>20</sub> H <sub>24</sub> O <sub>2</sub>     | 295.3      | 170               | 145.2 (38)                     | 199.1 (35)                    | 611.0                     | 0.9992         | 10.5                     |
| BPA     | C <sub>15</sub> H <sub>16</sub> O <sub>2</sub>     | 227.3      | 130               | 133.0 (30)                     | 211.0 (10)                    | 284.0                     | 0.9982         | 12.7                     |
| NP      | C <sub>15</sub> H <sub>24</sub> O                  | 219.3      | 125               | 133.1 (25)                     | 117.1 (55)                    | 568.4                     | 0.9966         | 20.0                     |
| E1-3G   | C <sub>24</sub> H <sub>29</sub> O <sub>8</sub> Na  | 445.2      | 150               | 269.1 (35)                     | 113.0 (20)                    | 113.6                     | 0.9997         | 10.6                     |
| E2-3G   | C <sub>24</sub> H <sub>31</sub> O <sub>8</sub> Na  | 447.2      | 155               | 113.0 (20)                     | 271.1 (40)                    | 121.5                     | 0.9999         | 10.0                     |
| E2-17G  | C <sub>24</sub> H <sub>31</sub> O <sub>8</sub> Na  | 447.2      | 165               | 85.0 (35)                      | 271.1 (40)                    | 231.5                     | 0.9991         | 5.2                      |
| E1-3S   | C <sub>18</sub> H <sub>21</sub> O <sub>5</sub> NaS | 349.1      | 110               | 269.1 (35)                     | 79.9 (55)                     | 751.4                     | 0.9998         | 1.6                      |
| E2-3S   | C <sub>18</sub> H <sub>23</sub> O <sub>5</sub> NaS | 351.0      | 170               | 271.1 (35)                     | 79.9 (35)                     | 451.5                     | 0.9996         | 2.7                      |
| E3-3S   | C <sub>18</sub> H <sub>23</sub> O <sub>6</sub> NaS | 367.0      | 165               | 287.1 (40)                     | 79.9 (35)                     | 709.7                     | 0.9966         | 1.7                      |

<sup>a</sup> For each estrogen and BPA, a 10-point calibration curve was established (0.5 to 500 ng L<sup>-1</sup>); while the concentrations of NP were raised by 10 folds.

<sup>b</sup> The instrumental limit of detection was determined by directly injecting serially diluted standards (with MQ water) into the mass spectrometer and then multiplying the concentration at 3:1 of signal to noise ratio by the injection volume (10 µL).

**Table S2**

Intra- and inter-day precisions evaluated at three concentration levels of target EDCs.

| Analyte  | Intra-day precision                |                       |                        | Inter-day precision                |                       |                        |
|----------|------------------------------------|-----------------------|------------------------|------------------------------------|-----------------------|------------------------|
|          | Recovery (RSD <sup>a</sup> ) (%/%) |                       |                        | Recovery (RSD <sup>b</sup> ) (%/%) |                       |                        |
|          | 5 ng L <sup>-1</sup>               | 50 ng L <sup>-1</sup> | 500 ng L <sup>-1</sup> | 5 ng L <sup>-1</sup>               | 50 ng L <sup>-1</sup> | 500 ng L <sup>-1</sup> |
| E1       | 89.2 (4.8) <sup>a</sup>            | 86.3 (5.9)            | 98.8 (2.1)             | 96.6 (13.0)                        | 86.5 (6.1)            | 93.0 (10.5)            |
| E2       | 109.9 (0.8)                        | 110.7 (0.3)           | 100.7 (0.5)            | 105.1 (5.9)                        | 91.2 (18.1)           | 99.8 (2.0)             |
| E3       | 93.7 (1.5)                         | 95.7 (6.6)            | 101.7 (1.8)            | 96.0 (7.6)                         | 97.9 (4.6)            | 99.2 (7.3)             |
| EE2      | 90.3 (8.7)                         | 88.1 (8.0)            | 98.3 (3.7)             | 87.1 (13.7)                        | 91.3 (10.6)           | 89.7 (4.6)             |
| BPA      | 94.1 (2.0)                         | 98.7 (2.9)            | 106.4 (5.5)            | 92.6 (3.7)                         | 105.0 (5.6)           | 107.7 (6.3)            |
| NP (/10) | 99.0 (2.5)                         | 99.7 (6.7)            | 101.4 (3.3)            | 95.7 (11.3)                        | 88.1 (10.3)           | 102.2 (9.2)            |
| E1-3G    | 99.0 (2.9)                         | 89.9 (1.9)            | 98.6 (4.5)             | 95.0 (5.6)                         | 94.8 (9.6)            | 96.4 (2.3)             |
| E2-3G    | 99.8 (0.9)                         | 94.4 (13.2)           | 96.7 (2.1)             | 104.1 (7.1)                        | 84.3 (5.9)            | 101.7 (4.9)            |
| E2-17G   | 93.6 (9.5)                         | 101.6 (14.3)          | 92.0 (8.2)             | 100.6 (7.4)                        | 105.1 (9.0)           | 92.7 (2.1)             |
| E1-3S    | 95.0 (2.9)                         | 98.1 (6.5)            | 98.5 (1.2)             | 98.1 (5.7)                         | 95.0 (12.3)           | 94.3 (8.3)             |
| E2-3S    | 96.9 (1.3)                         | 94.1 (4.4)            | 93.6 (0.8)             | 89.4 (8.7)                         | 100.3 (8.6)           | 95.1 (1.7)             |
| E3-3S    | 102.8 (2.5)                        | 87.0 (6.6)            | 102.3 (2.4)            | 97.3 (4.5)                         | 89.7 (13.9)           | 101.7 (4.3)            |

<sup>a</sup> Intra-day repeatability ( $n = 3$ ).<sup>b</sup> Inter-day repeatability ( $n = 3$ ).

**Table S3**

Major characteristics of the influent and effluent of a local WWTP.

| Wastewater | COD<br>(mg L <sup>-1</sup> ) | NH <sub>4</sub> <sup>+</sup> -N<br>(mg L <sup>-1</sup> ) | TN<br>(mg L <sup>-1</sup> ) | TP<br>(mg L <sup>-1</sup> ) |
|------------|------------------------------|----------------------------------------------------------|-----------------------------|-----------------------------|
| Influent   | 330.4 (2.8) <sup>a</sup>     | 18.8 (2.1)                                               | 33.5 (5.1)                  | 6.2 (0.7)                   |
| Effluent   | 35.8 (4.4)                   | <LOD <sup>b</sup>                                        | 17.5 (0.3)                  | 0.8 (0.1)                   |

<sup>a</sup> Mean concentration (SD),  $n = 3$ .

<sup>b</sup> LOD = 0.4 mg L<sup>-1</sup>.

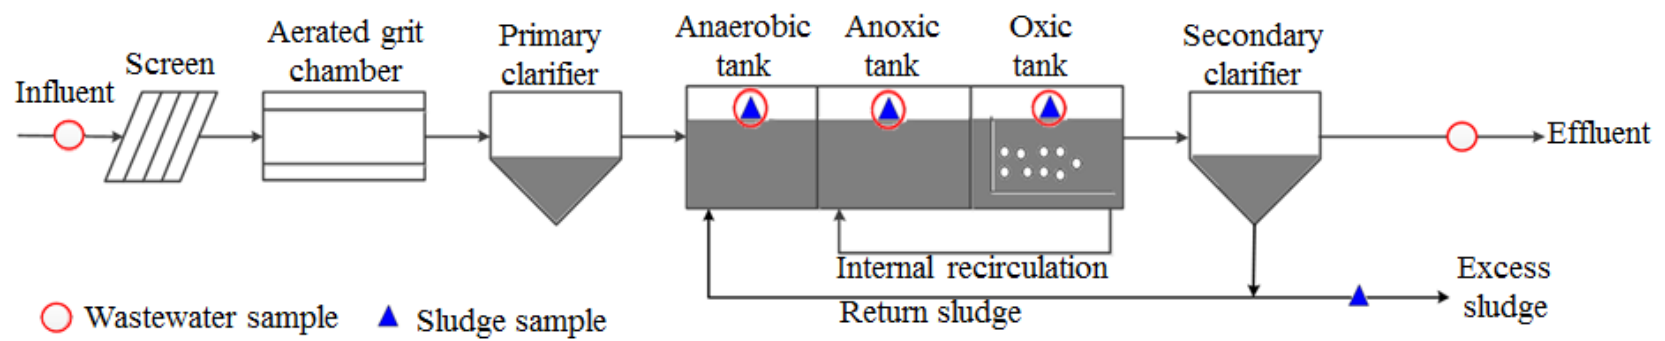

**Fig. S1.** Sampling points along the A/A/O treatment process in a local WWTP.

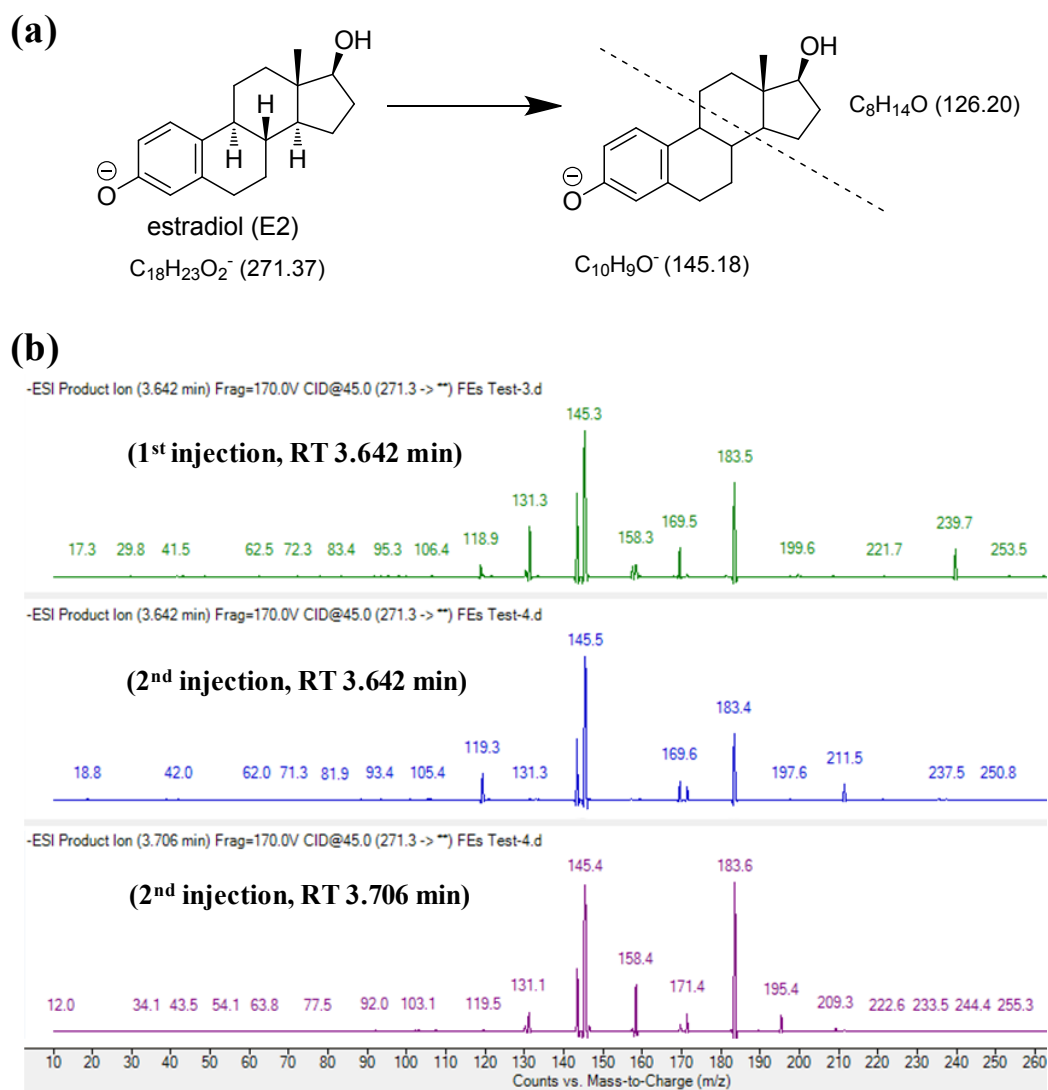

**Fig. S2.** (a) Illustration of E2 fragmentation to produce the 145.18 m/z ion; and (b) mass chromatograms of the product ions of E2 in the MS2 scan mode.

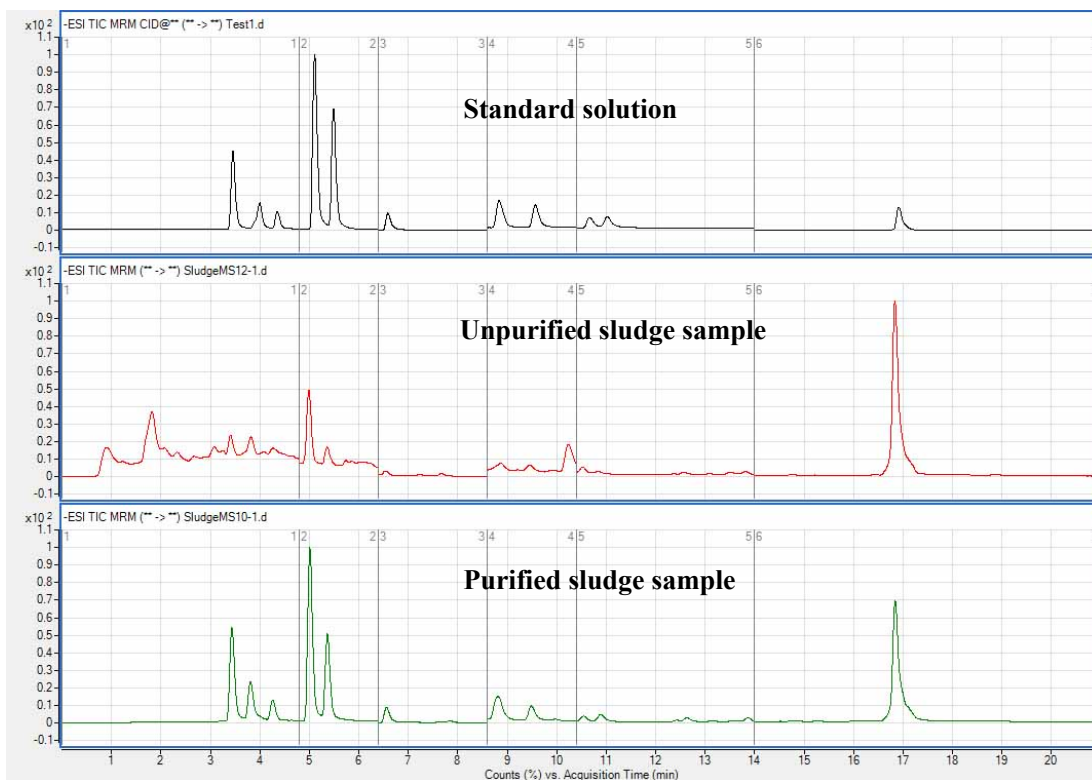

**Fig. S3.** Total-ion MRM chromatograms of 12 target EDCs ( $100 \mu\text{g L}^{-1}$  each) in standard solution (prepared in MQ water), unpurified sludge sample, and purified sludge sample.
